# Supplementary material for: Alzheimer’s disease as a multistage process: an analysis from a population-based cohort study
Source: publisher site journal article supplement (doi:10.18632/aging.101816), 2019-02-27
Supplement: Supplementary file [file aging-v11i4-101816-supplementary-material-SD1.pdf]

## SUPPLEMENTARY MATERIAL

**Supplementary Table 1. Frequency of *APOE* alleles in study population.**

| <i>APOE</i> genotype    | Study population<br>(N=9,362) |
|-------------------------|-------------------------------|
| $\epsilon 2/\epsilon 2$ | 63 (0.7)                      |
| $\epsilon 2/\epsilon 3$ | 1,208 (12.9)                  |
| $\epsilon 2/\epsilon 4$ | 250 (2.67)                    |
| $\epsilon 3/\epsilon 3$ | 5,467 (58.4)                  |
| $\epsilon 3/\epsilon 4$ | 2,161 (23.1)                  |
| $\epsilon 4/\epsilon 4$ | 213 (2.8)                     |

Abbreviations: *APOE*, apolipoprotein E.

Data are presented as number (percentage) of participants.

**Supplementary Table 2. Genetic variants included in the genetic risk score.**

| Chr | Rs-id       | ALT-<br>HRC | Assigned-gene       | Locus discovered in:                  | Effect estimate       | Maf    | Weight<br>ALT-HRC | R <sup>2</sup> -RS1 | R <sup>2</sup> -RS2 | R <sup>2</sup> -RS3 |
|-----|-------------|-------------|---------------------|---------------------------------------|-----------------------|--------|-------------------|---------------------|---------------------|---------------------|
| 19  | rs4147929   | G           | <i>ABCA7</i>        | Hollingsworth et al. , Naj et al.     | Lambert et al. (2013) | 0.19   | -0.135            | 0.916               | 0.917               | 0.991               |
| 2   | rs6733839   | T           | <i>BINI</i>         | Seshadri et al.                       | Lambert et al. (2013) | 0.409  | 0.188             | 0.960               | 0.911               | 0.962               |
| 20  | rs7274581   | C           | <i>CASS4</i>        | Lambert et al. (2013)                 | Lambert et al. (2013) | 0.083  | -0.139            | 0.990               | 0.989               | 0.990               |
| 6   | rs10948363  | G           | <i>CD2AP</i>        | Hollingsworth et al. , Naj et al.     | Lambert et al. (2013) | 0.266  | 0.098             | 0.998               | 0.998               | 0.998               |
| 11  | rs10838725  | C           | <i>CELF1</i>        | Lambert et al. (2013)                 | Lambert et al. (2013) | 0.316  | 0.075             | 0.998               | 0.998               | 0.998               |
| 8   | rs9331896   | T           | <i>CLU</i>          | Harold et al. , Lambert et al. (2009) | Lambert et al. (2013) | 0.379  | 0.146             | 0.902               | 0.974               | 0.901               |
| 1   | rs6656401   | G           | <i>CRI</i>          | Lambert et al. (2009)                 | Lambert et al. (2013) | 0.197  | -0.157            | 0.953               | 0.948               | 0.950               |
| 10  | rs7920721   | G           | <i>ECHDC3</i>       | Desikan et al.                        | Desikan et al.        | 0.387  | -0.067            | 1.000               | 1.000               | 1.000               |
| 7   | rs11771145  | A           | <i>EPHA1</i>        | Hollingsworth et al. , Naj et al.     | Lambert et al. (2013) | 0.338  | -0.102            | 0.998               | 0.998               | 0.999               |
| 14  | rs17125944  | C           | <i>FERMT2</i>       | Lambert et al. (2013)                 | Lambert et al. (2013) | 0.092  | 0.122             | 1.000               | 1.000               | 1.000               |
| 6   | rs111418223 | A           | <i>HLA-DRB1/5</i>   | Lambert et al. (2013)                 | Lambert et al. (2013) | 0.276  | -0.108            | 0.314               | 0.312               | 0.314               |
| 4   | rs13113697  | G           | <i>HS3ST1</i>       | Desikan et al.                        | Desikan et al.        | 0.283  | -0.067            | 0.999               | 0.998               | 0.999               |
| 2   | rs35349669  | T           | <i>INPP5D</i>       | Lambert et al.                        | Lambert et al. (2013) | 0.488  | 0.066             | 0.975               | 0.973               | 0.976               |
| 17  | rs118172952 | G           | <i>KANSL1</i>       | Jun et al.                            | Lambert et al. (2013) | 0.873  | -0.151            | 0.710               | 0.700               | 0.708               |
| 5   | rs190982    | A           | <i>MEF2C</i>        | Lambert et al. (2013)                 | Lambert et al. (2013) | 0.408  | 0.080             | 0.979               | 0.934               | 0.978               |
| 11  | rs983392    | G           | <i>MS4A6A</i>       | Hollingsworth et al. , Naj et al.     | Lambert et al. (2013) | 0.403  | -0.108            | 0.989               | 0.990               | 0.991               |
| 7   | rs2718058   | G           | <i>NME8</i>         | Lambert et al. (2013)                 | Lambert et al. (2013) | 0.373  | -0.070            | 1.000               | 1.000               | 1.000               |
| 11  | rs10792832  | G           | <i>PICALM</i>       | Harold et al.                         | Lambert et al. (2013) | 0.358  | 0.130             | 0.999               | 0.999               | 0.999               |
| 8   | rs28834970  | C           | <i>PTK2B</i>        | Lambert et al. (2013)                 | Lambert et al. (2013) | 0.366  | 0.096             | 0.993               | 0.990               | 0.994               |
| 14  | rs10498633  | T           | <i>SLC24A4-RIN3</i> | Lambert et al. (2013)                 | Lambert et al. (2013) | 0.217  | -0.104            | 0.999               | 0.999               | 1.000               |
| 11  | rs11218343  | C           | <i>SORL1</i>        | Lambert et al. (2013)                 | Lambert et al. (2013) | 0.039  | -0.270            | 0.998               | 0.995               | 0.998               |
| 6   | rs75932628  | T           | <i>TREM2</i>        | Guerreiro et al. , Jonsson et al.     | Ruiz et al.           | 0.0016 | 0.889             | 0.762               | 0.726               | 0.668               |
| 7   | rs1476679   | T           | <i>ZCWPW1</i>       | Lambert et al. (2013)                 | Lambert et al. (2013) | 0.287  | 0.078             | 0.995               | 0.996               | 0.995               |

Ordered by assigned gene name. References: Harold et al.[1], Seshadri et al.[2], Hollingsworth et al.[3], Naj et al.[4], Lambert et al. (2009,2013)[5, 6], Jonsson et al.[7], and Ruiz et al.[8] Minor allele Frequency (Maf) of Rotterdam Study (RS) 1 is shown and is representative of the MAF in RS2 and RS3. R<sup>2</sup>= imputation quality. RS1= initial Rotterdam Study cohort, RS2=first extension Rotterdam Study, RS3=second extension. Rotterdam Study cohorts were imputed separately. Gene names are ncbi gene names assigned to the loci in the corresponding references.

## SUPPLEMENTARY REFERENCES

1. Harold D, Abraham R, Hollingworth P, Sims R, Gerrish A, Hamshere ML, Pahwa JS, Moskvin V, Dowzell K, Williams A, Jones N, Thomas C, Stretton A, et al. Genome-wide association study identifies variants at *CLU* and *PICALM* associated with Alzheimer's disease. *Nat Genet.* 2009; 41:1088–93. <https://doi.org/10.1038/ng.440>
2. Seshadri S, Fitzpatrick AL, Ikram MA, DeStefano AL, Gudnason V, Boada M, Bis JC, Smith AV, Carassquillo MM, Lambert JC, Harold D, Schrijvers EM, Ramirez-Lorca R, et al, and CHARGE Consortium, and GERAD1 Consortium, and EADI1 Consortium. Genome-wide analysis of genetic loci associated with Alzheimer disease. *JAMA.* 2010; 303:1832–40. <https://doi.org/10.1001/jama.2010.574>
3. Hollingworth P, Harold D, Sims R, Gerrish A, Lambert JC, Carrasquillo MM, Abraham R, Hamshere ML, Pahwa JS, Moskvin V, Dowzell K, Jones N, Stretton A, et al, and Alzheimer's Disease Neuroimaging Initiative, and CHARGE consortium, and EADI1 consortium. Common variants at *ABCA7*, *MS4A6A/MS4A4E*, *EPHA1*, *CD33* and *CD2AP* are associated with Alzheimer's disease. *Nat Genet.* 2011; 43:429–35. <https://doi.org/10.1038/ng.803>
4. Naj AC, Jun G, Beecham GW, Wang LS, Vardarajan BN, Buross J, Gallins PJ, Buxbaum JD, Jarvik GP, Crane PK, Larson EB, Bird TD, Boeve BF, et al. Common variants at *MS4A4/MS4A6E*, *CD2AP*, *CD33* and *EPHA1* are associated with late-onset Alzheimer's disease. *Nat Genet.* 2011; 43:436–41. <https://doi.org/10.1038/ng.801>
5. Lambert JC, Heath S, Even G, Campion D, Sleegers K, Hiltunen M, Combarros O, Zelenika D, Bullido MJ, Tavernier B, Letenneur L, Bettens K, Berr C, et al, and European Alzheimer's Disease Initiative Investigators. Genome-wide association study identifies variants at *CLU* and *CR1* associated with Alzheimer's disease. *Nat Genet.* 2009; 41:1094–99. <https://doi.org/10.1038/ng.439>
6. Lambert JC, Ibrahim-Verbaas CA, Harold D, Naj AC, Sims R, Bellenguez C, DeStafano AL, Bis JC, Beecham GW, Grenier-Boley B, Russo G, Thorton-Wells TA, Jones N, et al, and Cohorts for Heart and Aging Research in Genomic Epidemiology. Meta-analysis of 74,046 individuals identifies 11 new susceptibility loci for Alzheimer's disease. *Nat Genet.* 2013; 45:1452–58. <https://doi.org/10.1038/ng.2802>
7. Jonsson T, Stefansson H, Steinberg S, Jonsdottir I, Jonsson PV, Snaedal J, Bjornsson S, Huttenlocher J, Levey AI, Lah JJ, Rujescu D, Hampel H, Giegling I, et al. Variant of *TREM2* associated with the risk of Alzheimer's disease. *N Engl J Med.* 2013; 368:107–16. <https://doi.org/10.1056/NEJMoa1211103>
8. Ruiz A, Dols-Icardo O, Bullido MJ, Pastor P, Rodríguez-Rodríguez E, López de Munain A, de Pancorbo MM, Pérez-Tur J, Alvarez V, Antonell A, López-Arrieta J, Hernández I, Tárraga L, et al, and dementia genetic Spanish consortium (DEGESCO). Assessing the role of the *TREM2* p.R47H variant as a risk factor for Alzheimer's disease and frontotemporal dementia. *Neurobiol Aging.* 2014; 35:444.e1–4. <https://doi.org/10.1016/j.neurobiolaging.2013.08.011>
